## REFERENCES

1. Fisher DM, Canfell PC, Fahey MR, Rosen JI, Rupp SM, Sheiner LB, Miller RD: Elimination of atracurium in humans: Contribution of Hofmann elimination and ester hydrolysis *versus* organ-based elimination. *ANESTHESIOLOGY* 65:6-12, 1986
2. Hughes R, Chapple DJ: Experimental studies with atracurium, a new neuromuscular blocking agent. *Br J Anaesth* 52:238P, 1980
3. Stiller RL, Cook DR, Chakravorti S: *In vitro* degradation of atracurium in human plasma. *Br J Anaesth* 57:1085-1088, 1985
4. Fahey MR, Rupp SM, Fisher DM, Miller RD, Sharma M, Canfell C, Castagnoli K, Hennis PJ: The pharmacokinetics and pharmacodynamics of atracurium in patients with and without renal failure. *ANESTHESIOLOGY* 61:699-702, 1984
5. Hull CJ: A mode for atracurium (editorial)? *Br J Anaesth* 55:95-96, 1983

(Accepted for publication September 24, 1986.)

Anesthesiology  
66:104-105, 1987

## Scented Masks in Pediatric Anesthesia

To the Editor:—I read with interest Yamashita's recent correspondence entitled "Fruit-flavored Mask Induction in Children."<sup>1</sup> I would caution clinicians about aerosolizing fruit flavors into the inhalational gas mixtures in the manner that these authors suggest. I have included a list of the common ingredients of fruit flavors used in this country to scent pediatric masks (Lorann Oils, Inc.) (Table

TABLE 1. Ingredients in Fruit Flavor Extracts\*

| Cherry                  |                         |
|-------------------------|-------------------------|
| Benzaldehyde            | Propylene Glycol Acetal |
| Propylene Glycol Acetal |                         |
| Benzaldehyde            |                         |
| Vanillin                |                         |
| Tolaldehyde             |                         |
| Heliotropine            |                         |
| Amyl Acetate            |                         |
|                         | Ethyl Isobutyrate       |
|                         | Ethyl Vanillin          |
|                         | Alpha Ionone            |
|                         | Anisyl Acetate          |
|                         | Frambinone              |
|                         | Maltol                  |
|                         | Red #40                 |
|                         | Blue #1                 |
| Grape                   |                         |
| Methyl Anthranilate     |                         |
| Ethyl Butyrate          |                         |
| Amyl Acetate            |                         |
| Citral                  |                         |
| Orange Oil              |                         |
| Vanillin                |                         |
|                         | Gamma Undecalactone     |
|                         | Ethyl Alcohol           |
|                         | Propylene Glycol        |
|                         | Polysorbate 80          |
|                         | Red #40                 |
|                         | Blue #1                 |
| Watermelon              |                         |
| Ethyl Acetate           |                         |
| Butyl Heptanoate        |                         |
| 2,6 Dimethyl 5-Heptenal |                         |
| Amyl Acetate            |                         |
| Ethyl Isovalerate       |                         |
| Iso Amyl Valerate       |                         |
| Ethyl Pelargonate       |                         |
|                         | Methyl Eugenol          |
|                         | Lemon Oil               |
|                         | Methyl Heptin           |
|                         | Carbonate               |
|                         | Ethyl Caprate           |
|                         | Ethyl Caprylate         |
|                         | Ethyl Alcohol           |
| Strawberry              |                         |
| Propylene Glycol        |                         |
| Aldehyde C-16           |                         |
| Alcohol 12%             |                         |
| Ethyl Vanillin          |                         |
| Ethyl Acetate           |                         |
|                         | Acetic Acid             |
|                         | Diacetyl                |
|                         | Orange Oil              |
|                         | Triacetin               |
|                         | Red #40                 |

\* Lorann Oils, Inc., Lansing, MI 48910.

1). Aerosolizing a compound with up to 15 ingredients (cherry) may not be ideal.

The issue of the safety in aerosolizing fruit extracts into anesthesia breathing circuits involves the toxicologic, allergic, and airway irritant potential of their chemical ingredients. While there is very little data in this area, there does exist some evidence to support a cautionary note about this practice.

From the toxicologic standpoint, the industrial toxicology literature does cite some evidence for concern. Ethyl acetate (threshold limit value of 400 ppm in air) has caused renal hyperemia, CNS depression, and respiratory tract irritation.<sup>2</sup> In addition, amyl acetate (threshold limit value of 100 ppm in air) has shown renal, hepatic, and CNS toxicity.<sup>2</sup> Propylene glycol is known to be associated with lactic acidosis.<sup>3</sup>

The glycols have been associated with allergic contact reactions.<sup>4</sup> Even without an overt allergic potential, patients with allergic histories (*i.e.*, hay fever, eczema) or reactive airway disease may not benefit from the intrinsic irritant properties associated with inhaling many of these chemicals.

Rather than direct aerosolization of these extracts, it seems safer to either apply small quantities to the face mask in the traditional manner, or to use a specifically designed face mask which has the technology of scent release from the polymer base. Such a scented mask is easier and safer, yet still achieves the advantages of scenting pediatric masks to camouflage the pungent odors of inhalational agents and to improve patient acceptance. Scented pediatric anesthesia masks are available from King Systems Corporation.\*

ALLEN J. HINKLE, M.D.

Assistant Professor of Surgery (Anes.) and Pediatrics  
Dartmouth-Hitchcock Medical Center  
Hanover, New Hampshire 03756

\* 15015 Herriman Boulevard, Noblesville, Indiana 46060

REFERENCES

1. Yamashita M, Motokawa K: Fruit-flavored mask induction for children. *ANESTHESIOLOGY* 64:837, 1986
2. Plunkett ER: *Handbook of Industrial Toxicology*. New York, Chemical Publishing Co., Inc., 1966

Anesthesiology  
66:105, 1987

*In reply:*—We thank Dr. Hinkle for his comments and concern about the use of fruit flavors to aid induction of anesthesia in children. The possible adverse reactions to chemical ingredients in fruit flavors cannot be totally ignored. However, fruit flavors have been used in more than 4000 cases over 5 yr at Hyogo Children's Hospital<sup>1</sup> and at our hospital,<sup>2</sup> and thus far we have not encountered any adverse reactions. Any drugs or chemicals, including fruit flavors, must be used carefully in patients with allergic histories or reactive airway disease.

The use of scented masks may be a good alternative, but it must be a costly alternative. One additional word of caution: ethyl alcohol in fruit flavors does interfere with measurement of volatile anesthetics by the Datex "Normac," an infrared anesthetic analyzer.<sup>3</sup>

MASAO YAMASHITA, M.D.  
*Anesthetist-in-Chief*

Anesthesiology  
66:105, 1987

3. Cate JC, Hedrick R: Propylene glycol intoxication and lactic acidosis. *N Engl J Med* 303:1237, 1980
4. Fisher AA: Immediate and delayed allergic contact reactions to polyethylene glycol. *Contact Dermatitis* 4:135-138, 1978

(Accepted for publication September 30, 1986.)

Ibaraki Children's Hospital  
Mito 311-41, Japan

HIROSHI MURATA, M.D.  
*Anesthetist-in-Chief*  
Hyogo Children's Hospital  
Kobe 654, Japan

REFERENCES

1. Murata H: Smoothing pediatric mask induction, an application of fruit flavors. *Masui* 8:1451-1452, 1984
2. Yamashita M, Motokawa K: "Fruit-flavored" mask induction for children. *ANESTHESIOLOGY* 64:837, 1986
3. Yamashita M, Tsuneto S: "Normac" falsely recognizes "fruit extract" as an anesthetic agent. *ANESTHESIOLOGY* 66:97, 1987

(Accepted for publication September 30, 1986.)

## Guided Orotracheal Intubation in the Operating Room using a Lighted Stylet

*To the Editor:*—I read with great interest the article by Ellis *et al.*<sup>1</sup> on this subject. Recently, Cavo<sup>2</sup> has described 30 cases of unilateral vocal cord paralysis after endotracheal intubation. Since transient voice changes and hoarseness are common after incubation, and since few of these patients have their larynx examined, the true incidence of this complication is not known. However, it is presumed that unilateral vocal cord paralysis is caused by undue pressure of the endotracheal tube cuff on the anterior branch of the recurrent laryngeal nerve in the sub-glottic region. The lighted stylet can be used to place the proximal end of the cuff on a plastic endotracheal tube just below the cricoid cartilage.<sup>3,4</sup> This is achieved by advancing the endotracheal tube through the laryngeal opening with the light of the stylet positioned at the proximal end of the cuff until the transilluminated light is seen in the neck, just below the cricoid cartilage. The cuff is then inflated, and the endotracheal tube is firmly secured. It is important for anesthesiologists to remember that en-

dotracheal tube cuffs are designed to produce a seal in the trachea, and not in the larynx.

S. MEHTA  
*Consultant Anaesthetist*  
*Chairman of the Anaesthetic Division*  
*Victoria Hospital*  
*Burnley, Lancashire, BB10 3HP, England*

REFERENCES

1. Ellis DG, Jakymec A, Kaplan RM, Steward RD, Freeman JA, Bleyaert A, Berkebile PE: Guided orotracheal intubation in the operating room using a lighted stylet: A comparison with direct laryngoscopic technique. *ANESTHESIOLOGY* 64:823-826, 1986
2. Cavo JW Jr: The vocal cord paralysis following intubation. *Laryngoscope* 95:1352-1359, 1985
3. Mehta A: Endotracheal intubation: Friend or foe. *Br Med J* 292: 694, 1986
4. Mehta S: Safer endotracheal intubation. *Lancet* 1:1148, 1986

(Accepted for publication September 30, 1986.)
